# Supplementary material for: A Comprehensive Genetic Study of Microtubule-Associated Genes Clusters for Male Infertility in a Taiwanese Cohort
Source: Preprints.org preprint supplement (doi:10.20944/preprints202309.0015.v1), 2023-09-01
Supplement: Supplementary file 1 [file supplementary]

**Full Title: A comprehensive genetic study of Microtubule-associated genes clusters for male infertility in a Taiwanese cohort**

**Short Title: Microtubule-associated genes clusters for male infertility**

Chying-Chyuan Chan1,2, Te-Hsin Yen2, Hao-Chen Tseng3, Brang Mai3, Pin Kuan Ho4, Jian-Liang Chou1,5, Gwo-Jang Wu1,6* andYu Chuan Huang1,3,5*

**SUPPLEMENTARY TABLES**

Table S1 The primers of SNPs on *ESR1*, *CFTR*, *SPATA16*, *STPG2*, *KIF6* and *SIMC1* were used to validate the targeted NGS and WES (upper table). The PCR reaction protocol is shown in the lower table and generally run for 34 cycles.


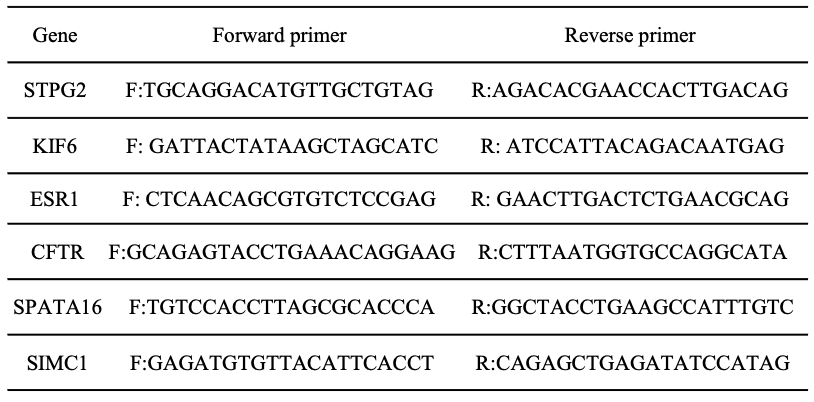


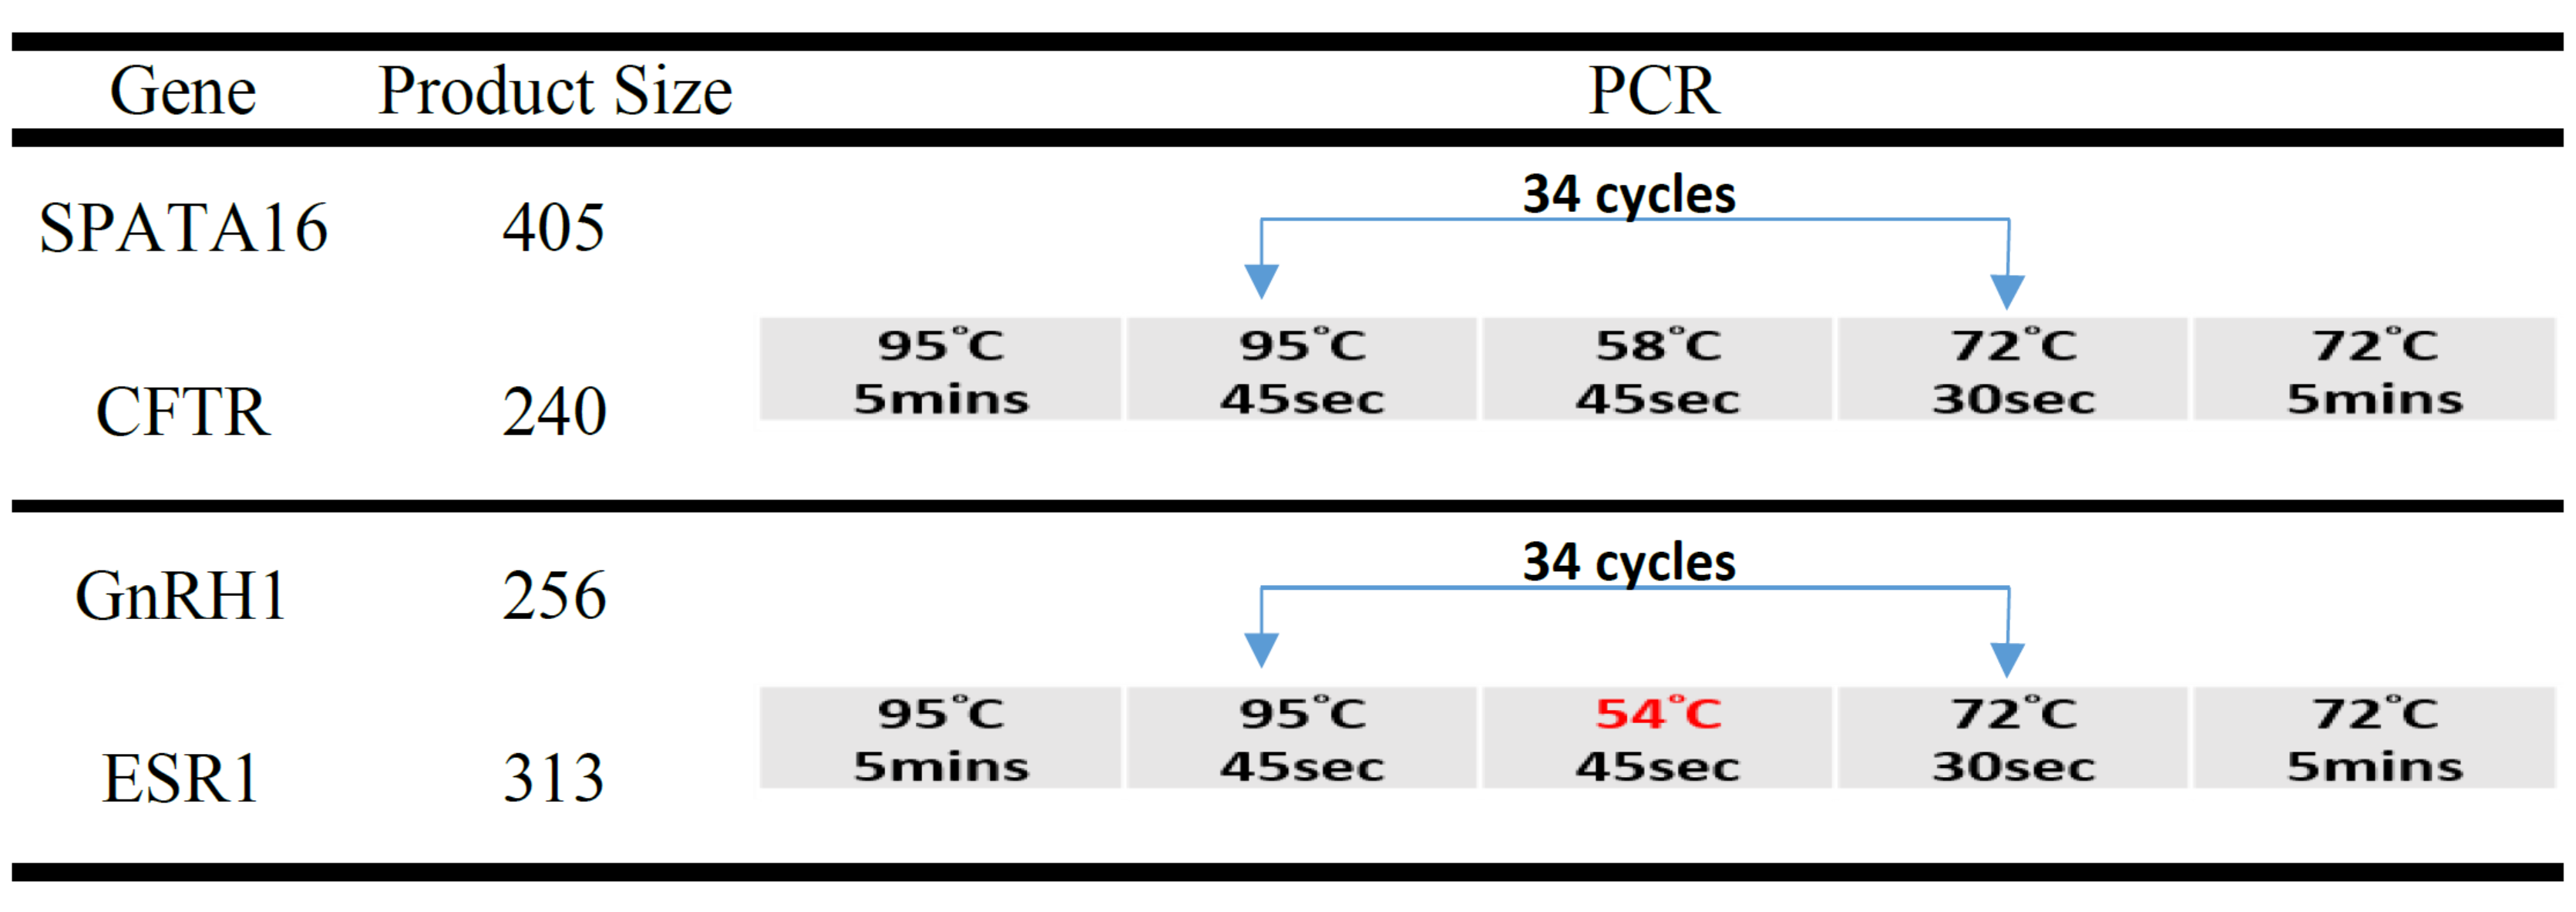


Table S2 Screening of Y chromosome microdeletion was used for testing samples for the presence of AZF-STS based on polymerase chain reaction. The map contains STSs in different AZF (Promega).


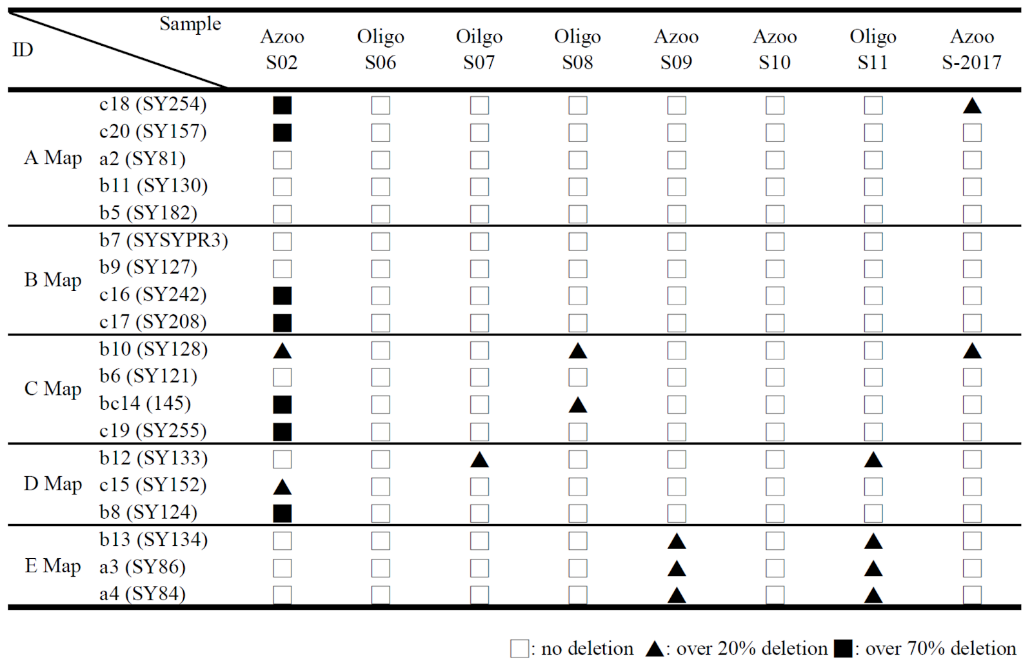


Table S3. Variants identified and in silico evaluation of pathogenicity of nucleotide changes in exons of CFTR and SPATA16 was performed using CADD, SIFT, Polyphen. MAF were checked in the GenomAD and Taiwan Biobank


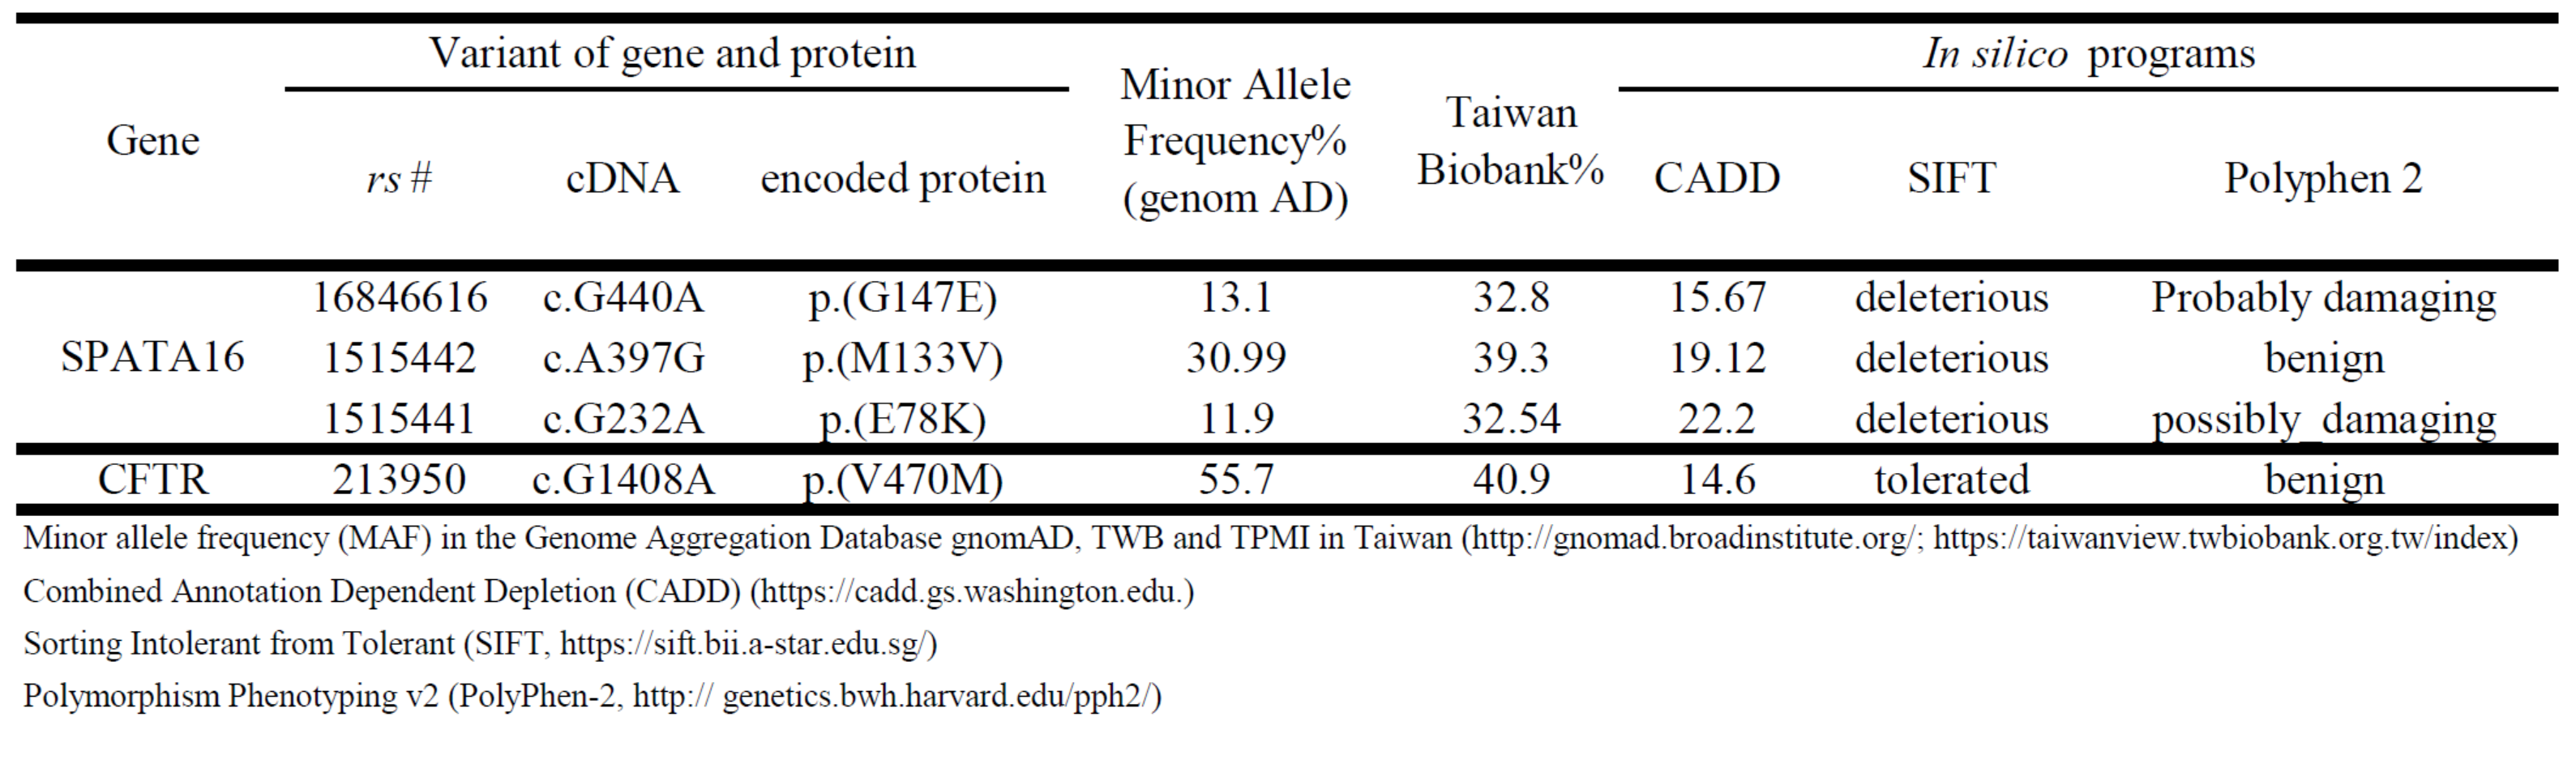


Table S4. Variants identified and in silico evaluation of pathogenicity of nucleotide changes in exons of 15 candidate SNPs were performed using CADD, SIFT, Polyphen. MAF and MAF_eas were checked in the CLC module. The mutation frequencies in cases are compared to those in controls and are also provided in the list.


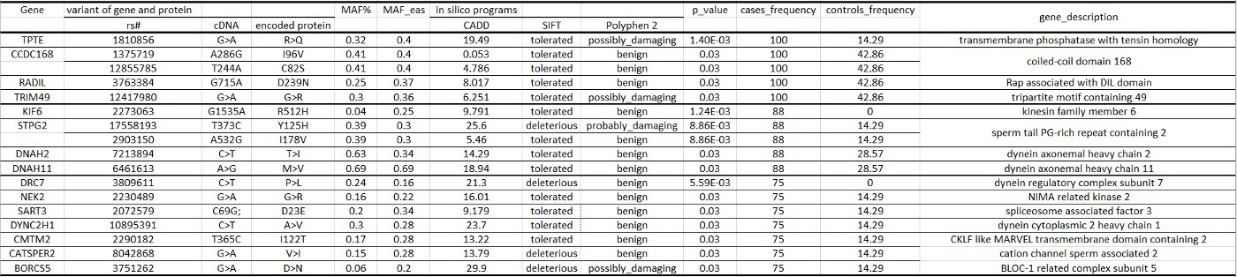


**SUPPLEMENTARY FIGURES**

Figure S1 AZF-STS based multiplex polymerase chain reaction (PCR) is routinely used to detect YCMD by tracing sequence-tagged sites (STSs) marks in the AZF (azoospermia factor region) at the long arm of Y chromosome (Yp) (Promega).

Figure S2A The designed amplicons (green) covered the Refseq (blue) of *FSHB, AURKC, LHB*, and *PICK1* regions of a 15-gene targeted NGS panel.

Figure S2B The designed amplicons (green) covered the Refseq (blue) of *DAZL, ESR1, GNRH1, NR5A1,* and *KAL2*(*FGFH1*) regions of a 15-gene targeted NGS panel.

Figure S2C The designed amplicons (green) covered the Refseq (blue) of *AR, TEX11, USP26* and *KAL1*(*ANOS1*) regions of a 15-gene targeted NGS panel.

Figure S3 Screening of Y chromosome microdeletion (Promega) was used for testing samples for the presence of AZF-STS based on polymerase chain reaction. (red-labeled ones are represented azoospermia; black-labeled ones are represented oligozoospermia.


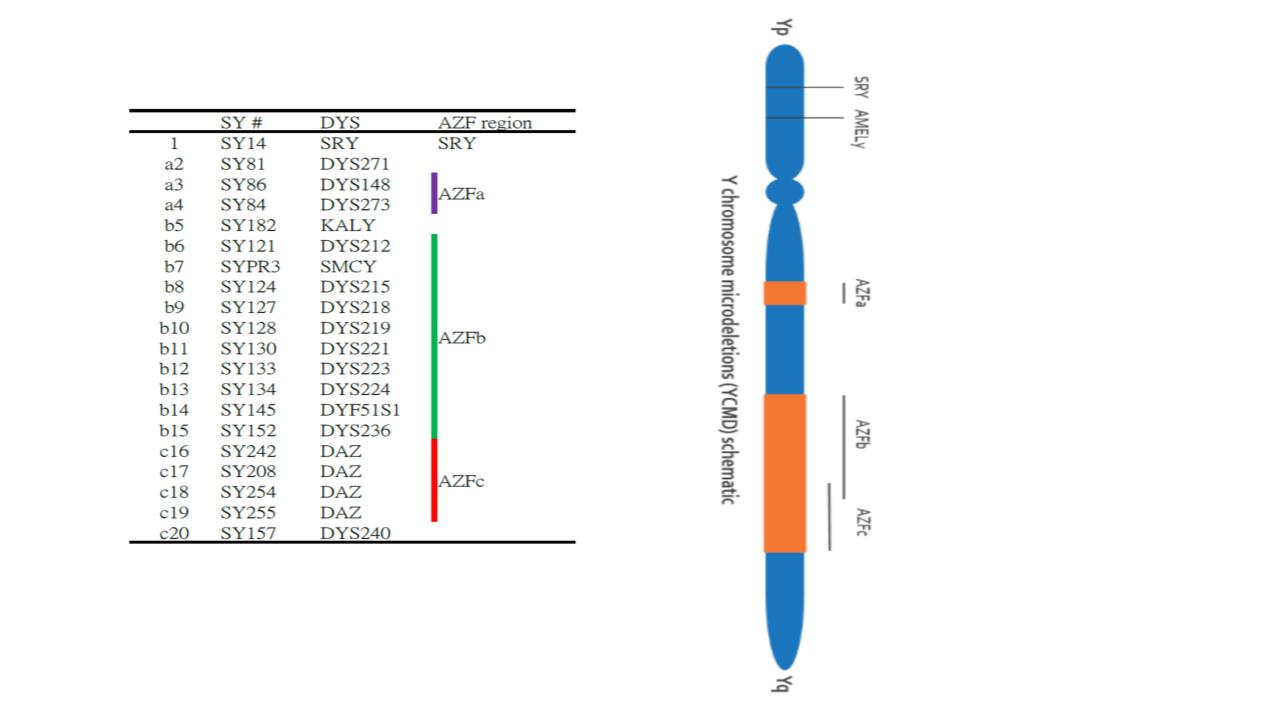


Figure S1


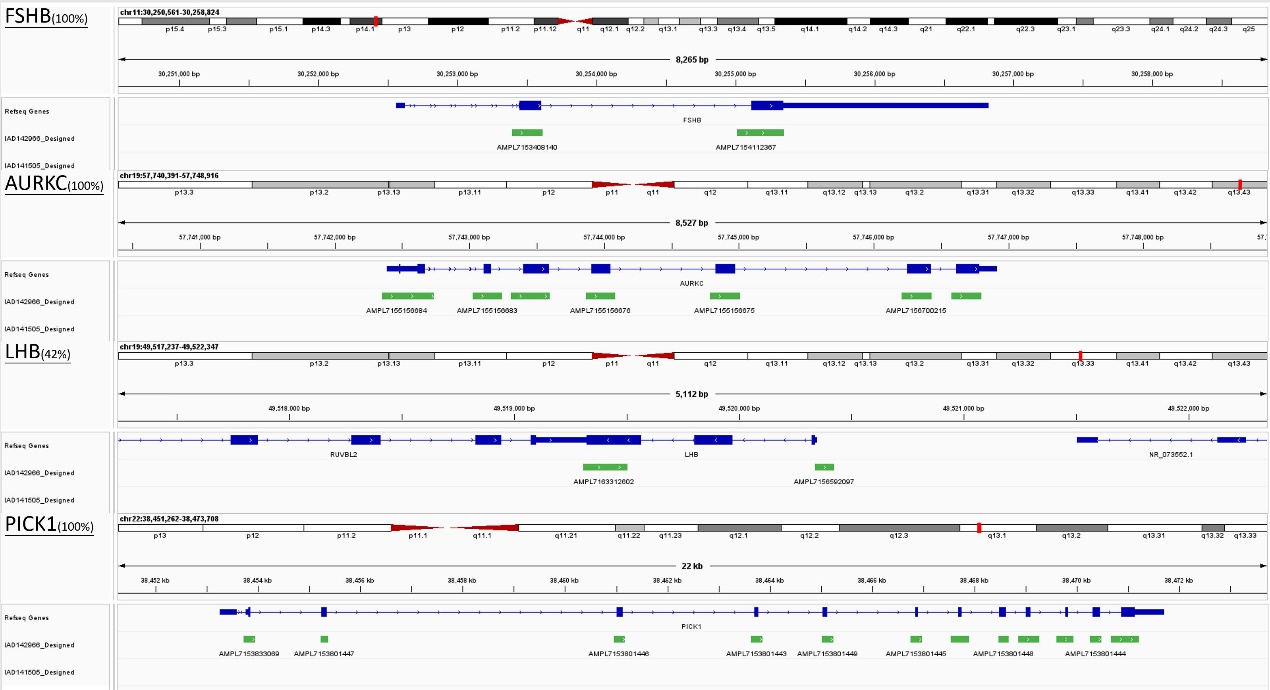


Figure S2A


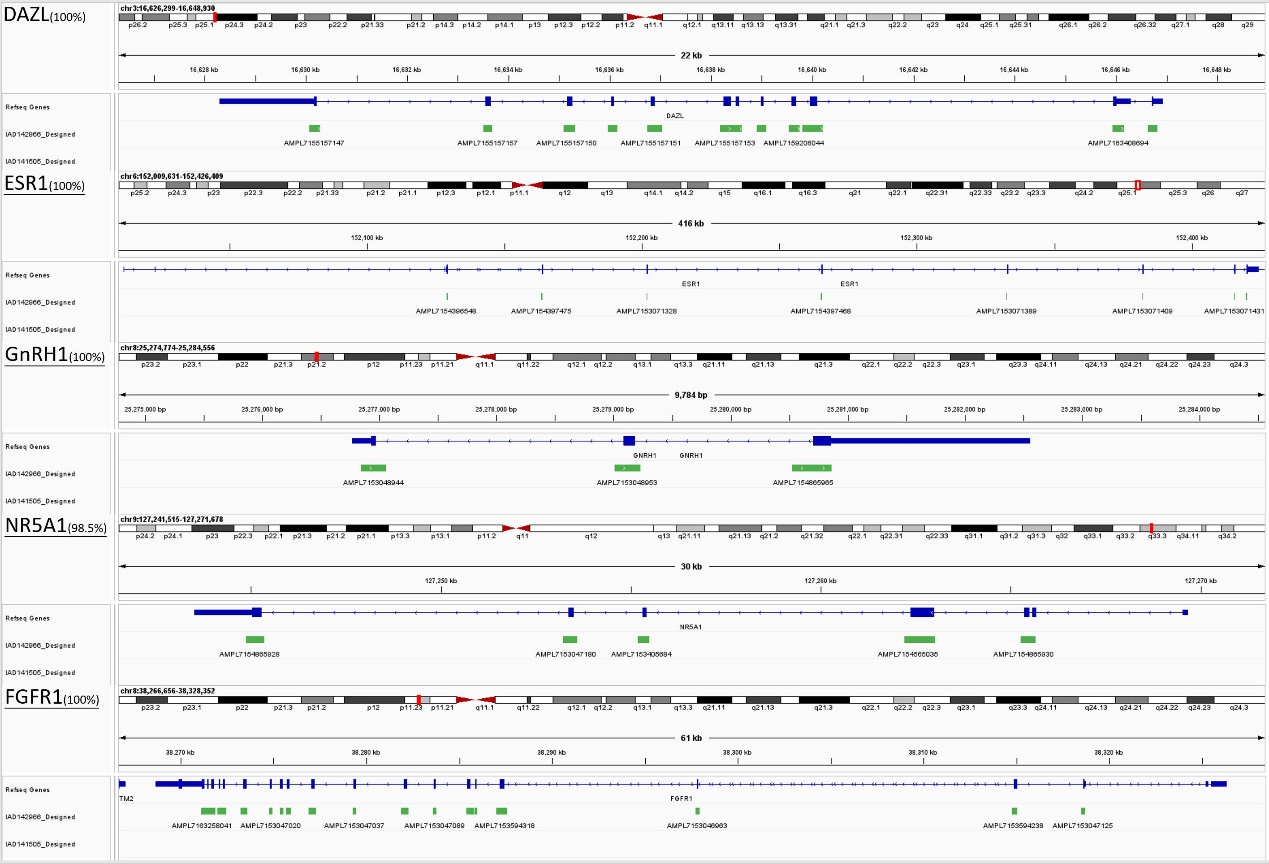


Figure S2B


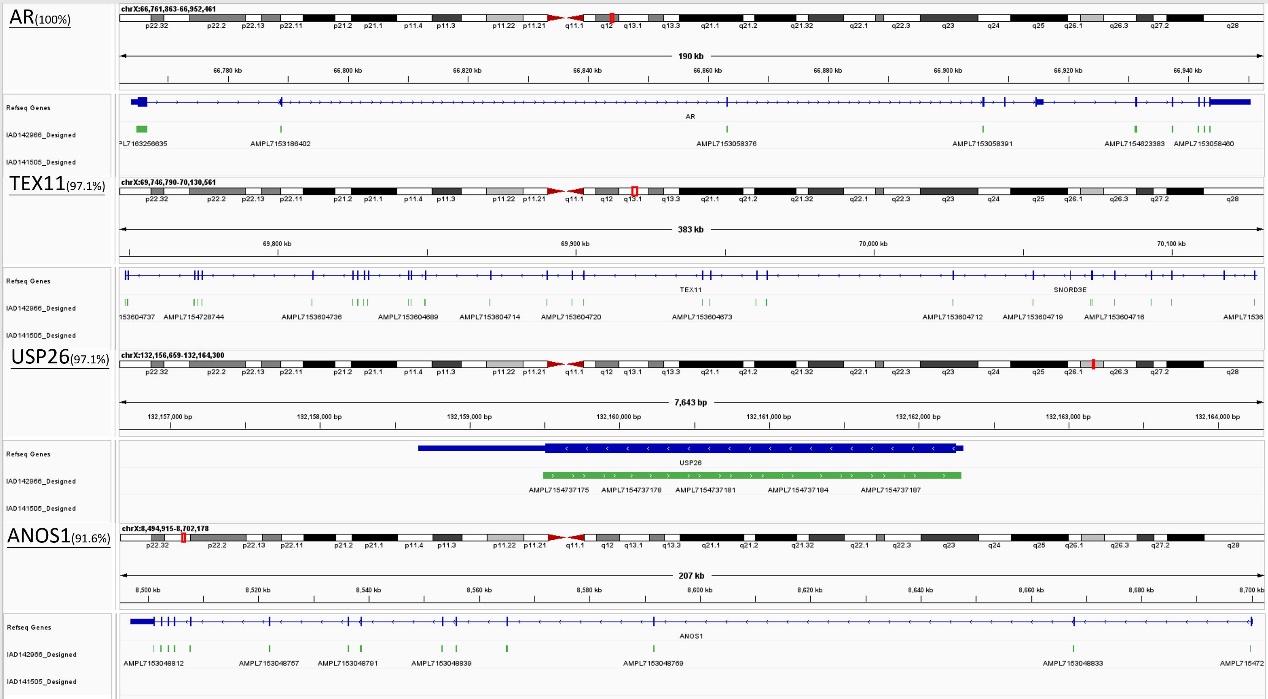


Figure S2C


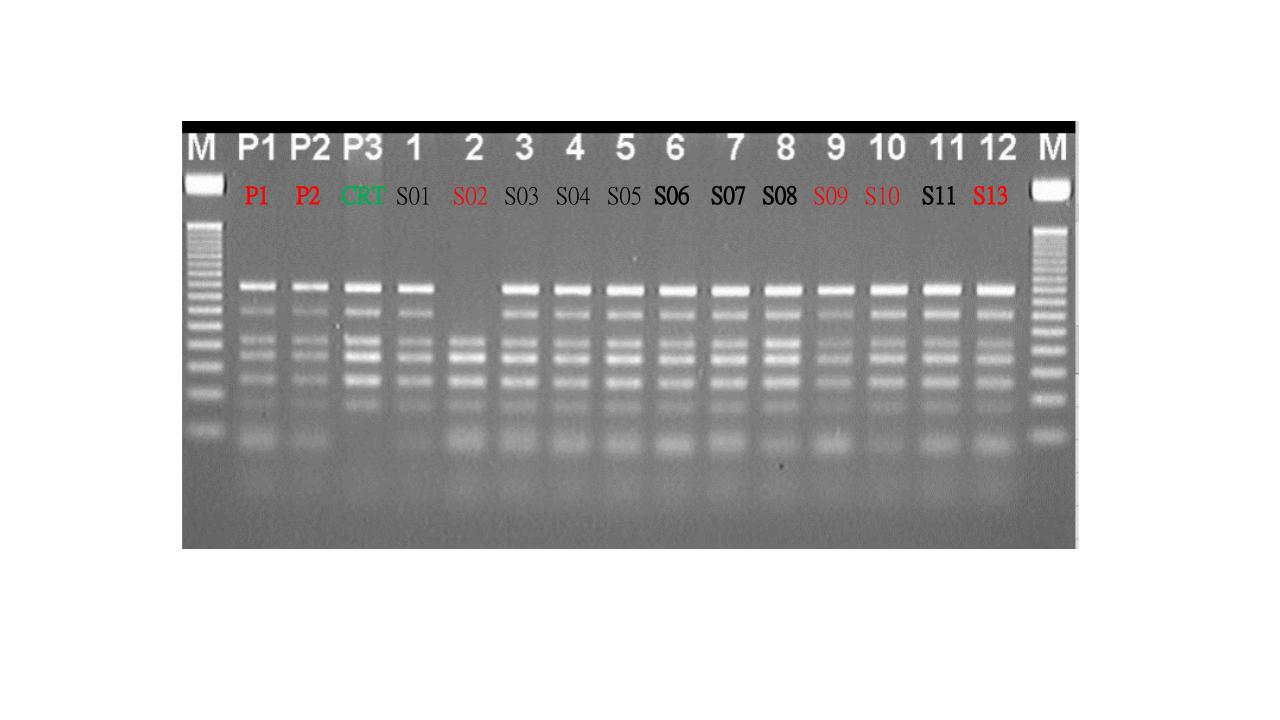


Figure S3


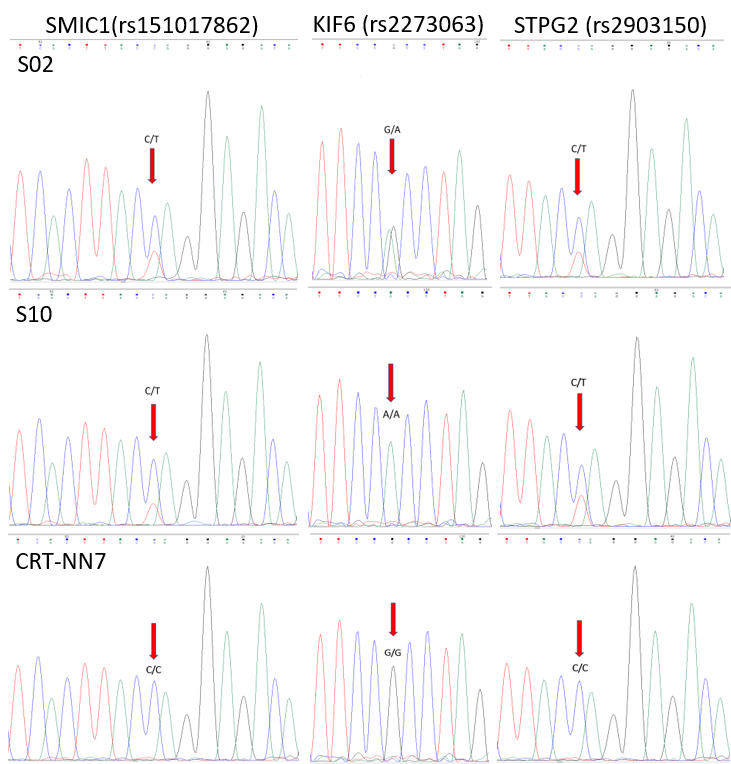


Figure S4
